# Supplementary material for: Quantum transport of short-gate MOSFETs based on monolayer MoSi2N4
Source: Royal Society of Chemistry journal article supplement (doi:10.1039/d2cp00086e), 2022-01-01
Supplement: d2cp00086e1.pdf [file d2cp00086e1.pdf]

## Supplementary Information

### Quantum transport of short-gate MOSFETs based on monolayer MoSi<sub>2</sub>N<sub>4</sub>

Bingjie Ye<sup>a</sup>, Xuecheng Jiang<sup>a</sup>, Yan Gu<sup>a</sup>, Guofeng Yang<sup>a,\*</sup>, Yushen Liu<sup>b</sup>, Huiqin Zhao<sup>a</sup>, Xifeng Yang<sup>b</sup>, Chunlei Wei<sup>c</sup>,

Xiumei Zhang<sup>a</sup>, Naiyan Lu<sup>a</sup>

<sup>a</sup>*School of Science, Jiangsu Provincial Research Center of Light Industrial Optoelectronic Engineering and Technology, Jiangnan University, Wuxi 214122, China*

<sup>b</sup>*School of Electronic and Information Engineering, Suzhou Key Laboratory of Advanced Lighting and Display Technologies, Changshu Institute of Technology, Changshu 215556, China*

<sup>c</sup>*Lumisource Technologies Co., Ltd., Wuxi, 214192, China*

*\*Email: gfyang@jiangnan.edu.cn (G. F. Yang)*

**Table S1.** Cartesian coordinates of the optimized MoSi<sub>2</sub>N<sub>4</sub>.

|   | Element    | x(Å)     | y(Å)        | z(Å)    |
|---|------------|----------|-------------|---------|
| 0 | Nitrogen   | 0.728071 | 0.84099     | 11.2342 |
| 1 | Nitrogen   | 0.728234 | -0.841012   | 8.96366 |
| 2 | Silicon    | 0.728244 | 0.840523    | 9.48292 |
| 3 | Molybdenum | 2.18436  | 0.000232082 | 12.48   |
| 4 | Nitrogen   | 0.728057 | 0.841012    | 13.7255 |
| 5 | Nitrogen   | 0.728232 | -0.84099    | 15.9948 |
| 6 | Silicon    | 0.728241 | 0.840552    | 15.4764 |

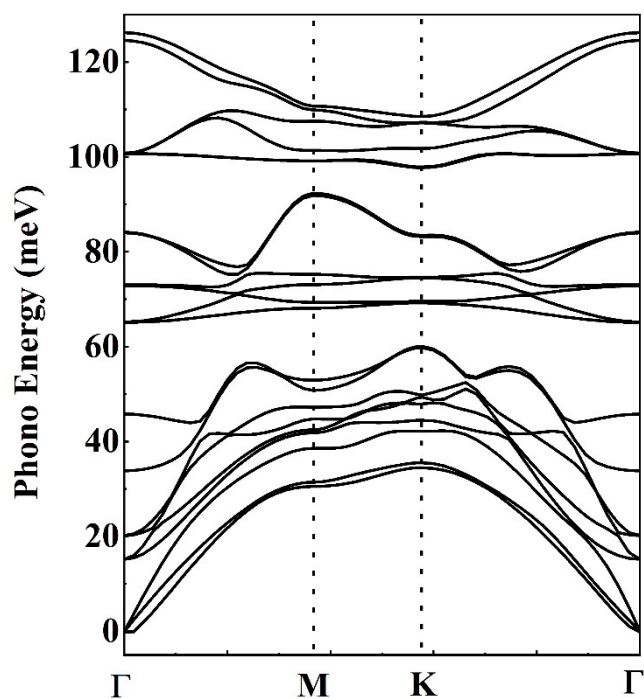

**Figure S1.** Phonon dispersion spectrum of ML MoSi<sub>2</sub>N<sub>4</sub>.

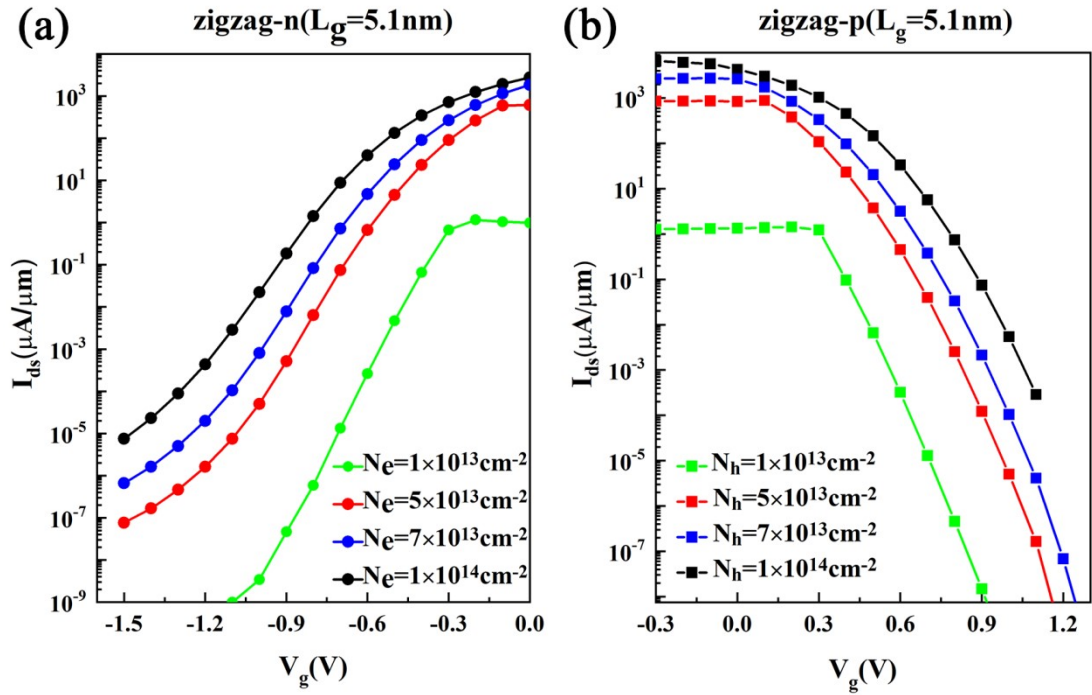

**Figure S2.** Comparison of the electrical characteristics of 5.1nm- $L_g$  DG ML zigzag  $\text{MoSi}_2\text{N}_4$  MOSFETs with different concentrations between (a) n-type and (b) p-type doping.

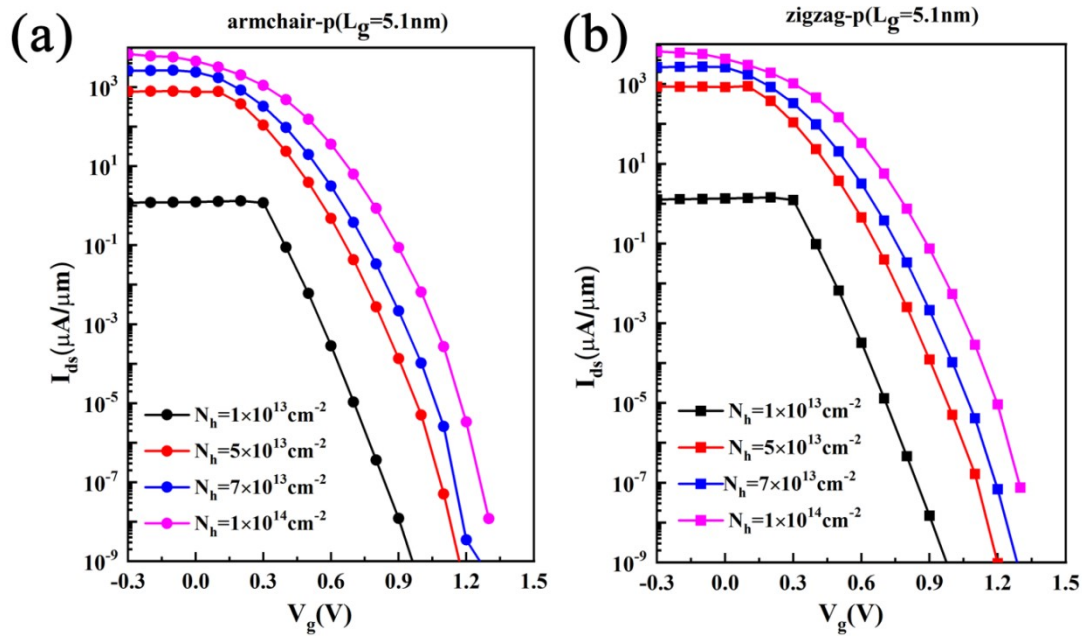

**Figure S3.** Comparison of electronic transport properties of DG ML  $\text{MoSi}_2\text{N}_4$  between (a) armchair and (b) zigzag directions.

**Table S2.** Comparison of electrical properties of 5.1nm- $L_g$  DG ML  $\text{MoSi}_2\text{N}_4$  MOSFETs in different electron transport

directions with different concentrations.

|            | EOT<br>(nm) | V <sub>dd</sub><br>(V) | N <sub>h</sub><br>(cm <sup>-2</sup> ) | SS<br>(mV/dec) | I <sub>on</sub><br>(μA/μm) |
|------------|-------------|------------------------|---------------------------------------|----------------|----------------------------|
| zigzag-p   | 0.41        | 0.64                   | 5×10 <sup>13</sup>                    | 45             | 850.2                      |
|            |             |                        | 7×10 <sup>13</sup>                    | 47             | 1616.5                     |
|            |             |                        | 10 <sup>14</sup>                      | 48             | 1428.8                     |
| armchair-p | 0.41        | 0.64                   | 5×10 <sup>13</sup>                    | 41             | 753.8                      |
|            |             |                        | 7×10 <sup>13</sup>                    | 35             | 1554.2                     |
|            |             |                        | 10 <sup>14</sup>                      | 41             | 1459.9                     |
| ITRS       | 0.41        | 0.64                   | -                                     | -              | 900                        |

**Table S3.** Comparison of parameters between 2 nm, 3 nm, 4 nm, 5.1 nm gate length DG ML MoSi<sub>2</sub>N<sub>4</sub> MOSFETs and

ITRS 2013 HP devices.

|             | L <sub>g</sub><br>(nm) | EOT<br>(nm) | V <sub>dd</sub><br>(V) | SS<br>(mV/dec) | I <sub>off</sub><br>(μA/μm) | I <sub>on</sub><br>(μA/μm) | I <sub>off</sub> /I <sub>on</sub> | C <sub>g</sub><br>(fF/μm) | τ<br>(ps)    | PDP<br>(fJ/μm) |
|-------------|------------------------|-------------|------------------------|----------------|-----------------------------|----------------------------|-----------------------------------|---------------------------|--------------|----------------|
| zigzag-n    | 5.1                    | 0.41        | 0.64                   | 98             | 0.1                         | 833.3                      | 8333                              | 0.228                     | 0.525        | 0.093          |
| zigzag-p    |                        |             |                        | 47             |                             | 1616.5                     | 16165                             | 0.213                     | 0.253        | 0.087          |
| <b>ITRS</b> | <b>5.1</b>             | <b>0.41</b> | <b>0.64</b>            |                | <b>0.1</b>                  | <b>900</b>                 |                                   | <b>0.600</b>              | <b>0.423</b> | <b>0.24</b>    |
| zigzag-n    | 4.0                    | 0.41        | 0.64                   | 125            | 0.1                         | 570.0                      | 5700                              | 0.168                     | 0.566        | 0.069          |
| zigzag-p    |                        |             |                        | 73             |                             | 1273.0                     | 12730                             | 0.158                     | 0.238        | 0.065          |
| zigzag-n    | 3.0                    | 0.41        | 0.64                   | 239            | 0.1                         | 25.4                       | 254                               | 0.291                     | 21.971       | 0.119          |
| UL=1.0nm    |                        |             |                        | 167            |                             | 225.8                      | 2258                              | 0.149                     | 1.267        | 0.061          |
| UL=2.1nm    |                        |             |                        | 128            |                             | 467.2                      | 4672                              | 0.163                     | 0.670        | 0.067          |
| UL=3.7nm    |                        |             |                        | 99             |                             | 422.6                      | 4226                              | -                         | -            | -              |
| zigzag-p    |                        |             |                        | 122            |                             | 605.1                      | 6051                              | 0.128                     | 0.406        | 0.052          |
| UL=1.0nm    |                        |             |                        | 91             |                             | 902.5                      | 9025                              | 0.154                     | 0.328        | 0.063          |
| UL=2.1nm    |                        |             |                        | 65             |                             | 895.3                      | 8953                              | 0.147                     | 0.315        | 0.060          |
| UL=3.7nm    |                        |             |                        | 54             |                             | 456.5                      | 4565                              | -                         | -            | -              |
| zigzag-n    | 2.0                    | 0.41        | 0.64                   | 342            | 0.1                         | 3.6                        | 36                                | 0.081                     | 42.843       | 0.033          |
| UL=1.0nm    |                        |             |                        | 276            |                             | 17.1                       | 171                               | -                         | -            | -              |
| UL=2.0nm    |                        |             |                        | 168            |                             | 205.1                      | 2051                              | -                         | -            | -              |
| UL=4.0nm    |                        |             |                        | 134            |                             | 225.9                      | 2259                              | -                         | -            | -              |
| zigzag-p    |                        |             |                        | 154            |                             | 257.9                      | 2579                              | 0.100                     | 0.744        | 0.041          |
| UL=1.0nm    |                        |             |                        | 137            |                             | 429.1                      | 4291                              | -                         | -            | -              |
| UL=2.0nm    |                        |             |                        | 89             |                             | 432.9                      | 4329                              | -                         | -            | -              |
| UL=4.0nm    |                        |             |                        | 77             |                             | 265.9                      | 2659                              | -                         | -            | -              |

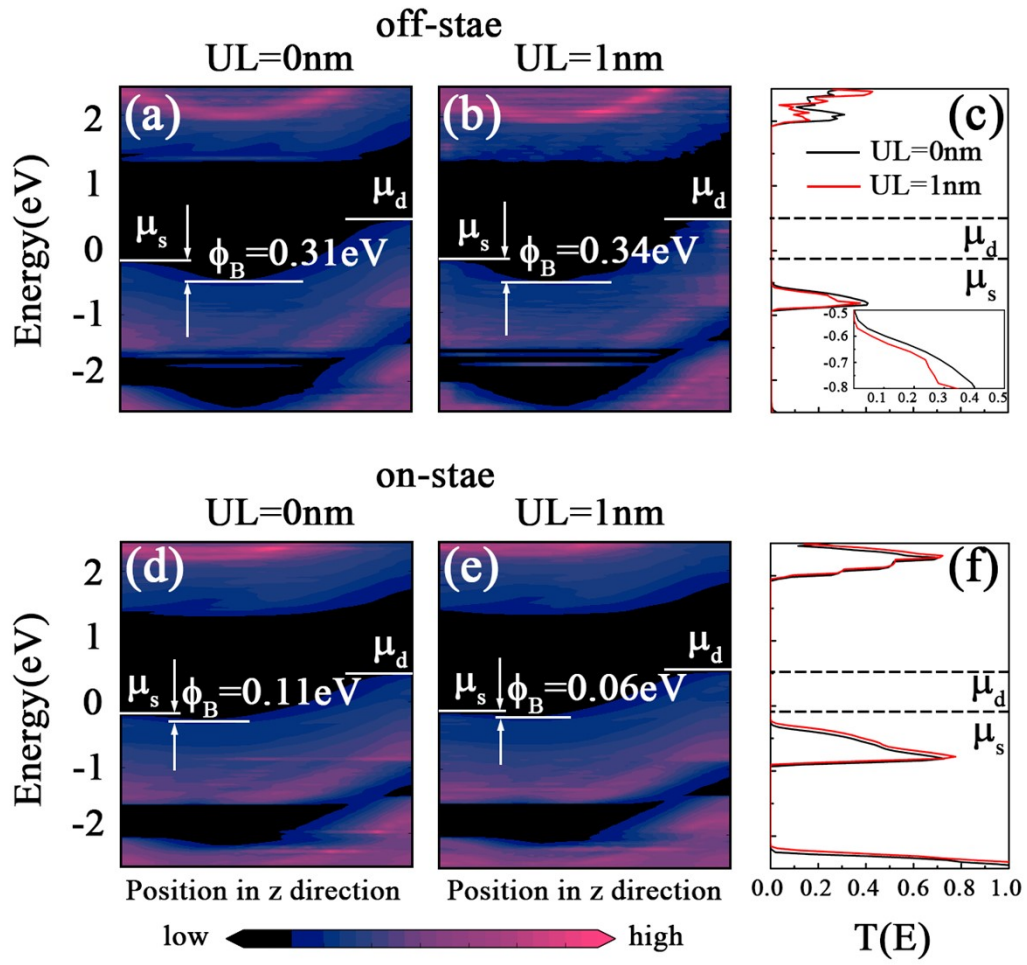

**Figure S4.** LDOS and transmission spectra of 2.0 nm- $L_g$  MoSi<sub>2</sub>N<sub>4</sub> p-MOSFETs with UL=0 and 1 nm along zigzag direction at HP (a-c) off- and (d-f) on-states, respectively, with  $N_h = 7 \times 10^{13} \text{ cm}^{-2}$ .

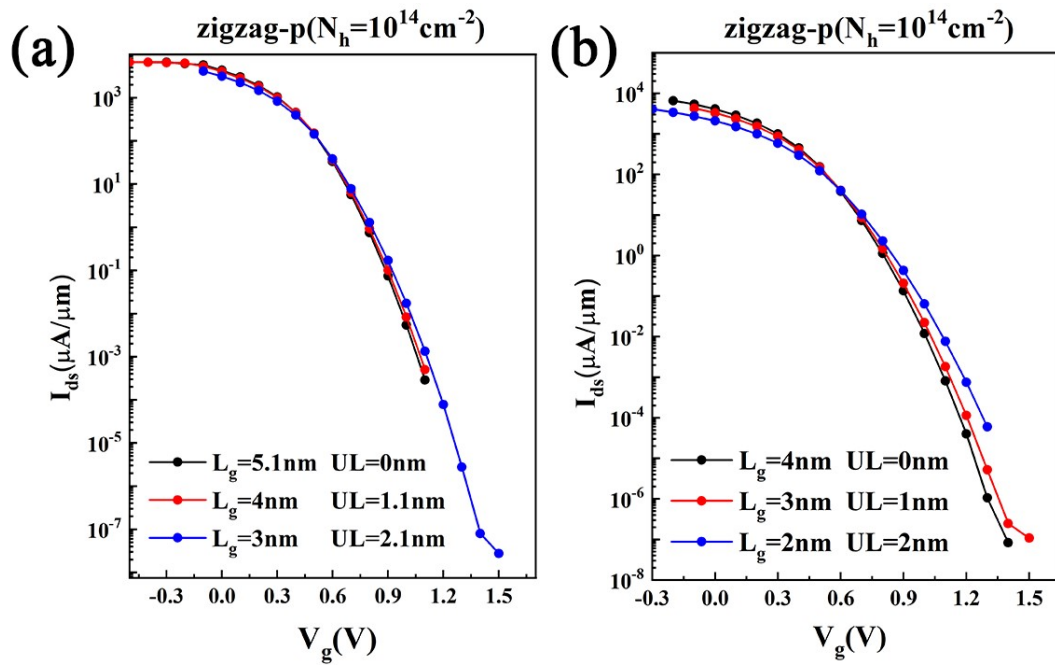

**Figure S5.** Comparison of electrical properties of DG ML MoSi<sub>2</sub>N<sub>4</sub> MOSFETs with different gate lengths and UL under the same channel lengths of (a) 5.1 nm and (b) 4 nm.
